# Supplementary material for: Associations between grip strength and incident type 2 diabetes: findings from the UK Biobank prospective cohort study
Source: PubMed Central journal article supplement — BMJ Open Diabetes Res Care. 2021 Aug 5;9(1):e001865. doi: 10.1136/bmjdrc-2020-001865 (PMC8344322; doi:10.1136/bmjdrc-2020-001865), 2021-08-05
Supplement: bmjdrc-2020-001865supp001.pdf [file bmjdrc-2020-001865supp001.pdf]

## Online-Only Supplemental Material

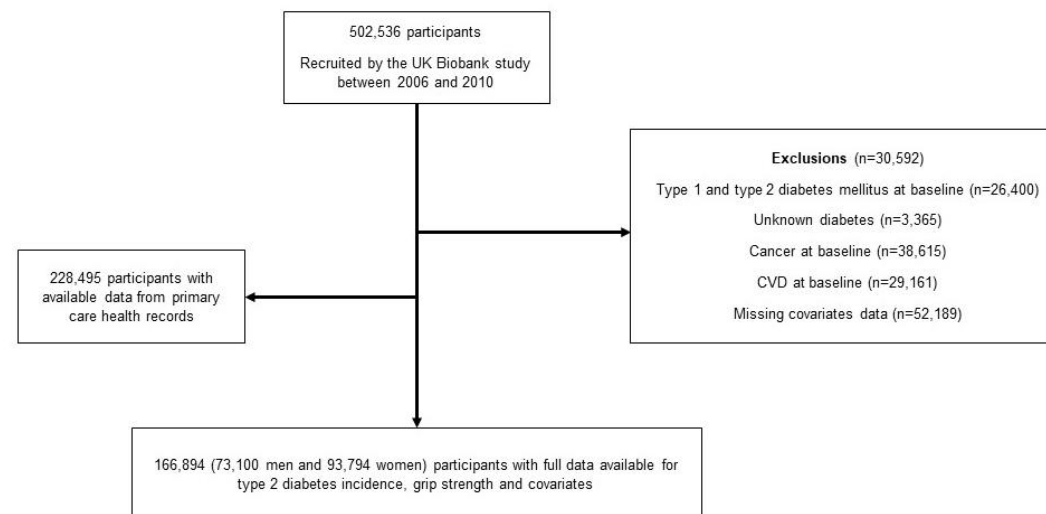

Supplementary Figure S1. Flowchart of participants throughout the study.

**Supplementary Table S1.** Cut-off point for absolute and relative grip strength quintiles.

|       |                | Absolute grip strength (kg)    |               |               |               |         |
|-------|----------------|--------------------------------|---------------|---------------|---------------|---------|
| Sex   | Age group      | Low                            | Middle/Low    | Middle        | High/Middle   | Highest |
| Women | <56 years      | <20.5                          | 20.5 - 24     | 24.5 - 27     | 27.5 - 30.5   | >30.5   |
|       | 56 to 65 years | <18                            | 18 - 21       | 21.5 - 24     | 24.5 - 27     | >27.5   |
|       | >65 years      | <16.5                          | 16.5 - 19     | 19.5 - 22     | 22.5 - 25     | >25     |
| Men   | <56 years      | <35                            | 35.5 - 40     | 40.5 - 44     | 44.5 - 49     | >49     |
|       | 56 to 65 years | <32                            | 32 - 36.5     | 37 - 40.5     | 41 - 45       | >45     |
|       | >65 years      | <29                            | 29 - 34       | 34.5 - 38     | 38.5 - 42     | >42.5   |
|       |                | Relative grip strength (kg/kg) |               |               |               |         |
| Women | <56 years      | <0.275                         | 0.276 - 0.337 | 0.338 - 0.391 | 0.392 - 0.456 | >0.456  |
|       | 56 to 65 years | <0.238                         | 0.238 - 0.293 | 0.294 - 0.341 | 0.342 - 0.399 | >0.399  |
|       | >65 years      | <0.219                         | 0.219 - 0.272 | 0.273 - 0.317 | 0.318 - 0.370 | >0.370  |
| Men   | <56 years      | >0.395                         | 0.395 - 0.463 | 0.464 - 0.521 | 0.522 - 0.588 | >0.588  |
|       | 56 to 65 years | >0.364                         | 0.364 - 0.428 | 0.429 - 0.483 | 0.484 - 0.547 | >0.547  |
|       | >65 years      | >0.343                         | 0.343 - 0.404 | 0.405 - 0.457 | 0.458 - 0.519 | >0.519  |

Data presented as kg for absolute grip strength and as kg by kg of body weight for relative grip strength.

**Supplementary Table S2.** Cohort characteristics by quintiles of grip strength in women.

| Characteristics                              | Grip strength quintiles |               |               |               |               |               |
|----------------------------------------------|-------------------------|---------------|---------------|---------------|---------------|---------------|
|                                              | Overall                 | High          | High/Middle   | Middle        | Middle/Low    | Low           |
| Women, n (%)                                 | 93,794                  | 19,313        | 16,440        | 18,320        | 22,176        | 17,545        |
| Age (mean, SD)                               | 55.8 (8.0)              | 51.6 (7.5)    | 54.5 (7.8)    | 56.1 (7.8)    | 57.8 (7.4)    | 59 (7.2)      |
| <b>Townsend Deprivation Index, n (%)</b>     |                         |               |               |               |               |               |
| Lower deprivation                            | 32,033 (34.2)           | 6,944 (36)    | 5,979 (36.4)  | 6,436 (35.1)  | 7,504 (33.8)  | 5,170 (29.5)  |
| Middle deprivation                           | 32,773 (34.9)           | 6,778 (35.1)  | 5,750 (35)    | 6,425 (35.1)  | 7,814 (35.2)  | 6,006 (34.2)  |
| Higher deprivation                           | 28,988 (30.9)           | 5,591 (29.0)  | 4,711 (28.7)  | 5,459 (29.8)  | 6,858 (30.9)  | 6,369 (36.3)  |
| <b>Ethnicity, n (%)</b>                      |                         |               |               |               |               |               |
| Whites                                       | 89,757 (95.7)           | 18,593 (96.3) | 15,866 (96.5) | 17,636 (96.3) | 21,284 (96)   | 16,378 (93.4) |
| Mixed                                        | 1,258 (1.3)             | 261 (1.4)     | 220 (1.3)     | 233 (1.3)     | 267 (1.2)     | 277 (1.6)     |
| South Asians                                 | 1,450 (1.6)             | 98 (0.5)      | 130 (0.8)     | 201 (1.1)     | 353 (1.6)     | 668 (3.8)     |
| Black                                        | 1,045 (1.1)             | 315 (1.6)     | 186 (1.1)     | 192 (1.1)     | 198 (0.9)     | 154 (0.9)     |
| Chinese                                      | 284 (0.3)               | 46 (0.2)      | 38 (0.2)      | 58 (0.3)      | 74 (0.3)      | 68 (0.4)      |
| <b>Education, n (%)</b>                      |                         |               |               |               |               |               |
| College or University degree                 | 35,117 (45.1)           | 8,803 (49.6)  | 6,725 (46.9)  | 6,883 (44.9)  | 7,509 (42.4)  | 5,197 (40.6)  |
| A levels/AS levels or equivalent             | 11,047 (14.2)           | 2,628 (14.8)  | 2,150 (15)    | 2,141 (14)    | 2,421 (13.7)  | 1,707 (13.3)  |
| O levels/GCSEs or equivalent                 | 22,361 (28.7)           | 4,455 (25.1)  | 3,837 (26.7)  | 4,452 (29)    | 5,519 (31.2)  | 4,098 (32)    |
| SEs or equivalent/NVQ or HND or HNC          | 9,424 (12.1)            | 1,860 (10.5)  | 1,643 (11.5)  | 1,852 (12.1)  | 2,263 (12.8)  | 1,806 (14.1)  |
| <b>Smoking status, n (%)</b>                 |                         |               |               |               |               |               |
| Never                                        | 57,048 (60.8)           | 11,663 (60.4) | 10,025 (61)   | 11,149 (60.9) | 13,540 (61.1) | 10,671 (60.8) |
| Previous                                     | 28,669 (30.6)           | 5,809 (30.1)  | 4,983 (30.3)  | 5,638 (30.8)  | 6,874 (31)    | 5,365 (30.6)  |
| Current                                      | 8,077 (8.6)             | 1,841 (9.5)   | 1,432 (8.7)   | 1,533 (8.4)   | 1,762 (8)     | 1,509 (8.6)   |
| <b>Diet and physical activity</b>            |                         |               |               |               |               |               |
| Process meat intake, portion/week (mean, SD) | 1.6 (1.0)               | 1.6 (1.0)     | 1.6 (1.0)     | 1.6 (1.0)     | 1.6 (1.0)     | 1.6 (1.0)     |
| Red meat intake, portion/week (mean, SD)     | 2 (1.4)                 | 2 (1.4)       | 1.9 (1.3)     | 2 (1.3)       | 2 (1.3)       | 2 (1.4)       |
| Fruit and vegetable intake, g/day (mean, SD) | 348.4 (188.3)           | 344.5 (187.5) | 348.5 (186.8) | 349.7 (189.3) | 348.1 (180.3) | 351.5 (199.4) |
| Alcohol intake (mean, SD)                    | 3.1 (1.5)               | 3 (1.4)       | 3 (1.5)       | 3.1 (1.5)     | 3.2 (1.5)     | 3.4 (1.6)     |
| Total Sedentary time, h/day (mean, SD)       | 4.7 (2.0)               | 4.6 (2.0)     | 4.6 (1.9)     | 4.7 (2.0)     | 4.7 (2.0)     | 4.8 (2.1)     |
| Total physical activity,                     | 2,664.5                 | 2,749.4       | 2,688         | 2,656.2       | 2,628.1       | 2,597.2       |

|                                         |               |               |               |               |               |               |
|-----------------------------------------|---------------|---------------|---------------|---------------|---------------|---------------|
| MET-hr/week (mean, SD)                  | (2,743)       | (2,743.1)     | (2,761.3)     | (2,737.8)     | (2,730.1)     | (2,744.8)     |
| Grip strength (kg)                      | 23.6 (6.2)    | 31.9 (3)      | 26.9 (0.9)    | 23.9 (0.9)    | 20.5 (1.1)    | 14.7 (3.3)    |
| Grip strength per body weight (kg/kg)   | 0.3 (0.1)     | 0.5 (0.1)     | 0.4 (0.1)     | 0.4 (0.1)     | 0.3 (0.1)     | 0.2 (0.1)     |
| <b>Sleep categories, n (%)</b>          |               |               |               |               |               |               |
| Normal (7-9 h per day)                  | 70,230 (74.9) | 15,086 (78.1) | 12,611 (76.7) | 13,769 (75.2) | 16,431 (74.1) | 12,333 (70.3) |
| Short sleep (<7 h per day)              | 22,019 (23.5) | 4,019 (20.8)  | 3,611 (22)    | 4,296 (23.5)  | 5,326 (24)    | 4,767 (27.2)  |
| Long sleep (>9 h per day)               | 1,545 (1.7)   | 208 (1.1)     | 218 (1.3)     | 255 (1.4)     | 419 (1.9)     | 445 (2.5)     |
| <b>Adiposity</b>                        |               |               |               |               |               |               |
| Waist circumference, cm (mean, SD)      | 83.9 (11.9)   | 83.5 (11.9)   | 83 (11.6)     | 83.4 (11.6)   | 84 (11.9)     | 85.5 (12.4)   |
| BMI, kg/m <sup>2</sup> (mean, SD)       | 26.9 (4.9)    | 26.8 (5)      | 26.5 (4.8)    | 26.7 (4.8)    | 26.8 (4.9)    | 27.4 (5.2)    |
| <b>BMI category</b>                     |               |               |               |               |               |               |
| Underweight (<18.5 kg/m <sup>2</sup> )  | 702 (0.8)     | 93 (0.5)      | 126 (0.8)     | 134 (0.7)     | 182 (0.8)     | 167 (1.0)     |
| Normal (18.5-24.9 kg/m <sup>2</sup> )   | 37,368 (39.8) | 7,968 (41.3)  | 6,983 (42.5)  | 7,499 (40.9)  | 8,800 (39.7)  | 6,118 (34.9)  |
| Overweight (25-29.9 kg/m <sup>2</sup> ) | 35,145 (37.5) | 7,054 (36.5)  | 6,140 (37.4)  | 6,921 (37.8)  | 8,319 (37.5)  | 6,711 (38.3)  |
| Obese (≥ 30.0 kg/m <sup>2</sup> )       | 20,579 (21.9) | 4,198 (21.7)  | 3,191 (19.4)  | 3,766 (20.6)  | 4,875 (22)    | 4,549 (25.9)  |

Data is presented as mean and SD for continuous variables and as frequency and % for categorical variables.

BMI: body mass index, SD: standard deviation, MET: metabolic equivalent task,

**Supplementary Table S3.** Cohort characteristics by quintiles of grip strength in men.

| Characteristics                              | Grip strength quintiles |               |               |               |               |               |
|----------------------------------------------|-------------------------|---------------|---------------|---------------|---------------|---------------|
|                                              | Overall                 | High          | High/Middle   | Middle        | Middle/Low    | Low           |
| Participants, n (%)                          | 73,100                  | 14,436        | 16,483        | 14,979        | 14,075        | 13,127        |
| Age, years (mean, SD)                        | 55.8 (8.2)              | 52.3 (7.8)    | 54.9 (8.0)    | 56.4 (8.0)    | 57.5 (8.0)    | 58.6 (7.8)    |
| <b>Townsend Deprivation Index</b> , n (%)    |                         |               |               |               |               |               |
| Lower deprivation                            | 25,402 (34.8)           | 5,547 (38.4)  | 6,107 (37.1)  | 5,277 (35.2)  | 4,714 (33.5)  | 3,757 (28.6)  |
| Middle deprivation                           | 25,104 (34.3)           | 5,083 (35.2)  | 5,747 (34.9)  | 5,208 (34.8)  | 4,796 (34.1)  | 4,270 (32.5)  |
| Higher deprivation                           | 22,594 (30.9)           | 3,806 (26.4)  | 4,629 (28.1)  | 4,494 (30.0)  | 4,565 (32.4)  | 5,100 (38.9)  |
| <b>Ethnicity</b> , n (%)                     |                         |               |               |               |               |               |
| Whites                                       | 69,920 (95.7)           | 13,982 (96.9) | 15,975 (96.9) | 14,429 (96.3) | 13,407 (95.3) | 12,127 (92.4) |
| Mixed                                        | 793 (1.1)               | 127 (0.9)     | 162 (1.0)     | 143 (1.0)     | 161 (1.1)     | 200 (1.5)     |
| South Asians                                 | 1,500 (2.1)             | 103 (0.7)     | 173 (1.1)     | 259 (1.7)     | 342 (2.4)     | 623 (4.8)     |
| Black                                        | 730 (1.0)               | 209 (1.5)     | 151 (0.9)     | 118 (0.8)     | 123 (0.9)     | 129 (1.0)     |
| Chinese                                      | 157 (0.2)               | 15 (0.1)      | 22 (0.1)      | 30 (0.2)      | 42 (0.3)      | 48 (0.4)      |
| <b>Education</b> , n (%)                     |                         |               |               |               |               |               |
| College or University degree                 | 28,965 (47.1)           | 5,850 (45.1)  | 6,740 (47)    | 6,039 (48)    | 5,511 (48)    | 4,825 (47.7)  |
| A levels/AS levels or equivalent             | 7,608 (12.4)            | 1,586 (12.2)  | 1,760 (12.3)  | 1,530 (12.2)  | 1,421 (12.4)  | 1,311 (13)    |
| O levels/GCSEs or equivalent                 | 13,942 (22.7)           | 3,048 (23.5)  | 3,203 (22.4)  | 2,807 (22.3)  | 2,593 (22.6)  | 2,291 (22.6)  |
| SEs or equivalent/NVQ or HND or HNC          | 10,971 (17.8)           | 2,484 (19.2)  | 2,624 (18.3)  | 2,205 (17.5)  | 1,962 (17.1)  | 1,696 (16.8)  |
| <b>Smoking status</b> , n (%)                |                         |               |               |               |               |               |
| Never                                        | 37,932 (51.9)           | 7,833 (54.3)  | 8,654 (52.5)  | 7,689 (51.3)  | 7,095 (50.4)  | 6,661 (50.7)  |
| Previous                                     | 26,418 (36.1)           | 4,881 (33.8)  | 5,921 (35.9)  | 5,543 (37.0)  | 5,276 (37.5)  | 4,797 (36.5)  |
| Current                                      | 8,750 (12.0)            | 1,722 (11.9)  | 1,908 (11.6)  | 1,747 (11.7)  | 1,704 (12.1)  | 1,669 (12.7)  |
| <b>Diet and physical activity</b>            |                         |               |               |               |               |               |
| Process meat intake, portion/week (mean, SD) | 2.2 (1.0)               | 2.2 (1.0)     | 2.2 (1.0)     | 2.2 (1.0)     | 2.2 (1.0)     | 2.2 (1.1)     |
| Red meat intake, portion/week (mean, SD)     | 2.2 (1.5)               | 2.3 (1.4)     | 2.2 (1.4)     | 2.2 (1.5)     | 2.2 (1.5)     | 2.2 (1.6)     |
| Fruit and vegetable intake, g/day (mean, SD) | 299.2 (192.6)           | 299.9 (183.9) | 300.1 (190.0) | 300.9 (189.7) | 298 (193.4)   | 296.8 (206.9) |
| Alcohol intake (mean, SD)                    | 2.6 (1.4)               | 2.5 (1.3)     | 2.5 (1.3)     | 2.5 (1.4)     | 2.6 (1.4)     | 2.8 (1.5)     |

|                                                 |                   |                 |                   |                   |                   |                   |
|-------------------------------------------------|-------------------|-----------------|-------------------|-------------------|-------------------|-------------------|
| Total Sedentary time, h/day (mean, SD)          | 5.4 (2.4)         | 5.5 (2.5)       | 5.4 (2.4)         | 5.4 (2.4)         | 5.4 (2.4)         | 5.4 (2.5)         |
| Total physical activity, MET-hr/week (mean, SD) | 3,198.1 (3,435.1) | 3,367 (3,536.7) | 3,282.7 (3,467.6) | 3,197.4 (3,374.6) | 3,118.8 (3,351.8) | 2,981.1 (3,421.8) |
| Grip strength (kg)                              | 40.1 (8.7)        | 52.3 (4.4)      | 44.3 (1.6)        | 39.5 (1.2)        | 35 (1.4)          | 27.5 (4.5)        |
| Grip strength per body weight (kg/kg)           | 0.5 (0.1)         | 0.6 (0.1)       | 0.5 (0.1)         | 0.5 (0.1)         | 0.4 (0.1)         | 0.3 (0.1)         |
| <b>Sleep categories, n (%)</b>                  |                   |                 |                   |                   |                   |                   |
| Normal (7-9 h per day)                          | 54,251 (74.2)     | 10,871 (75.3)   | 12,364 (75.0)     | 11,199 (74.8)     | 10,450 (74.3)     | 9,367 (71.4)      |
| Short sleep (<7 h per day)                      | 17,935 (24.5)     | 3,463 (24.0)    | 3,962 (24.0)      | 3,601 (24.0)      | 3,426 (24.3)      | 3,483 (26.5)      |
| Long sleep (>9 h per day)                       | 914 (1.3)         | 102 (0.7)       | 157 (1.0)         | 179 (1.2)         | 199 (1.4)         | 277 (2.1)         |
| <b>Adiposity</b>                                |                   |                 |                   |                   |                   |                   |
| Waist circumference, cm (mean, SD)              | 96 (10.7)         | 96.5 (10.3)     | 95.7 (10.4)       | 95.6 (10.7)       | 95.7 (10.8)       | 96.4 (11.3)       |
| BMI, kg/m <sup>2</sup> (mean, SD)               | 27.5 (4.0)        | 28.1 (3.9)      | 27.5 (3.8)        | 27.4 (3.9)        | 27.3 (4.0)        | 27.4 (4.3)        |
| <b>BMI category</b>                             |                   |                 |                   |                   |                   |                   |
| Underweight (<18.5 kg/m <sup>2</sup> )          | 175 (0.2)         | 8 (0.1)         | 16 (0.1)          | 31 (0.2)          | 37 (0.3)          | 83 (0.6)          |
| Normal (18.5-24.9 kg/m <sup>2</sup> )           | 19,297 (26.4)     | 2,967 (20.6)    | 4,222 (25.6)      | 4,141 (27.7)      | 4,134 (29.4)      | 3,833 (29.2)      |
| Overweight (25-29.9 kg/m <sup>2</sup> )         | 37,045 (50.7)     | 7,706 (53.4)    | 8,591 (52.1)      | 7,624 (50.9)      | 6,924 (49.2)      | 6,200 (47.2)      |
| Obese (≥ 30.0 kg/m <sup>2</sup> )               | 16,583 (22.7)     | 3,755 (26)      | 3,654 (22.2)      | 3,183 (21.3)      | 2,980 (21.2)      | 3,011 (22.9)      |

Data is presented as mean and SD for continuous variables and as frequency and % for categorical variables.

BMI: body mass index, SD: standard deviation, MET: metabolic equivalent task,

**Supplementary Table S4.** Advance Rate Period (RAP) for incidence T2DM in men and women by quintiles of relative handgrip strength.

|                | <i>RAP for T2DM Incidence (95% CI)</i> |                   |
|----------------|----------------------------------------|-------------------|
|                | Women                                  | Men               |
| Highest (Ref.) | Ref.                                   | Ref.              |
| Higher-Middle  | 8.6 (-0.7; 15.4)                       | 12.1 (5.0; 16.5)  |
| Middle         | 11.3 (3.6; 17.4)                       | 19.8 (15.6; 22.4) |
| Middle-Lower   | 20.4 (17.0; 25.2)                      | 22.4 (19.1;24.4)  |
| Lowest         | 23.0 (20.7; 27.5)                      | 34.5 (35.2; 34.0) |

Estimated based on RR shown in Figure 2 for model 2.
